# Supplementary material for: Enhanced ethopabate adsorption in monodispersed porous carbon derived from zeolitic imidazolate framework-8
Source: Royal Society of Chemistry journal article supplement (doi:10.1039/d2nj00843b), 2022-01-01
Supplement: d2nj00843b1.pdf [file d2nj00843b1.pdf]

Supplementary Information:

## **Enhanced ethopabate adsorption in monodispersed porous carbon derived from zeolitic imidazolate framework-8**

*Haoyun Hu<sup>a</sup>, Guihua Ruan<sup>a,\*</sup>, Xiangqiong Jiang<sup>a</sup>, Hong Pan<sup>a</sup>, Zhuqiang Wu<sup>a</sup>, Yipeng*

*Huang<sup>a,\*</sup>*

a. Guangxi Colleges and Universities Key Laboratory of Food Safety and Detection,  
College of Chemistry and Bioengineering, Guilin University of Technology, Guilin  
541004, Guangxi, China

\* Corresponding author. Guihua Ruan  
Tel.: +86-773-5898551  
Fax: +86-773-5892796  
E. mail: guihuaruan@hotmail.com (G. Ruan)

\* Corresponding author. Yipeng Huang  
E. mail: huangyp@glut.edu.cn

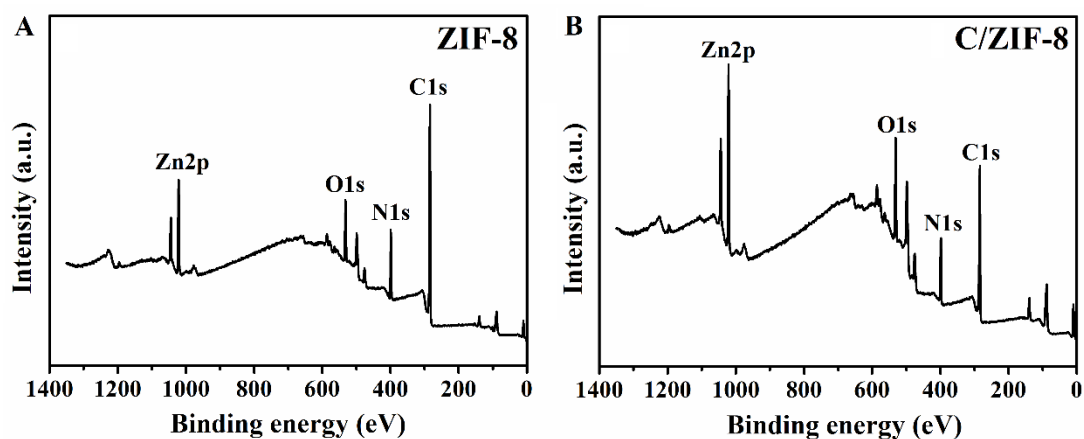

**Fig. S1** The XPS spectra of ZIF-8 (A) and C/ZIF-8 (B).

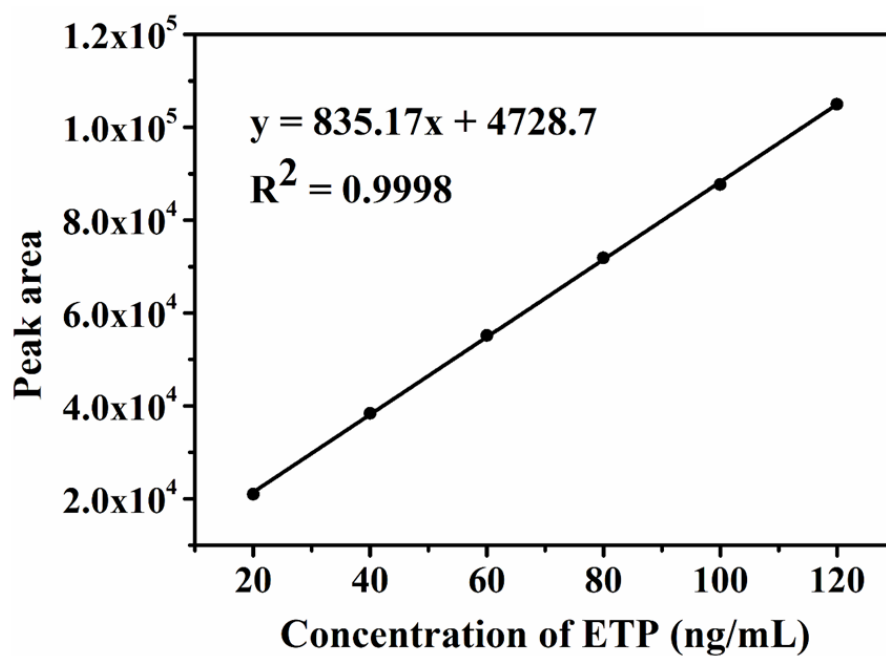

**Fig. S2** The calibration curve for ETP analysis using HPLC

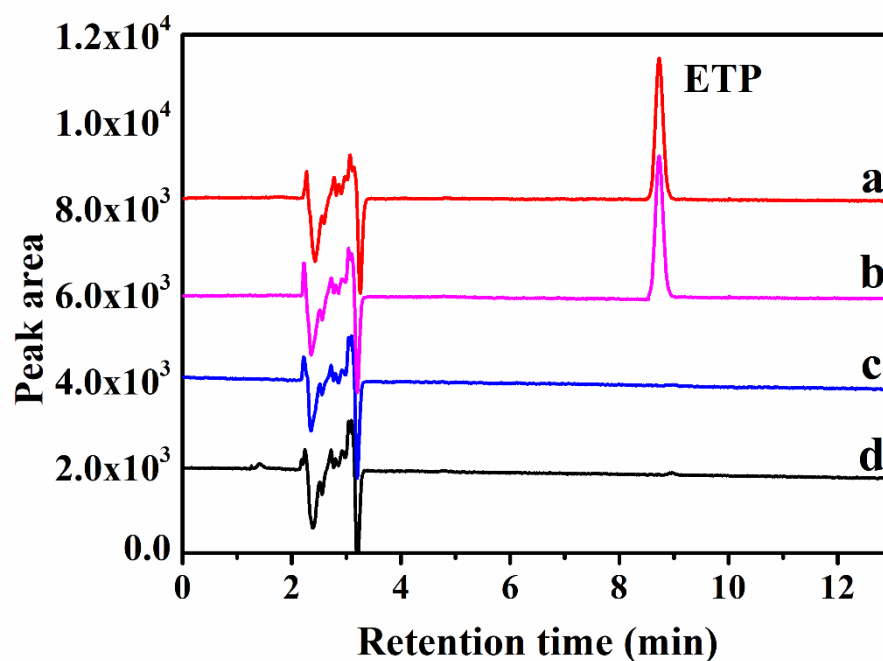

**Fig. S3** HPLC chromatograms of 80 ng/mL ETP standard solution (a), the chicken tissue samples spiked with 80 ng/mL ETP before (b) and after (c) adsorbed by C/ZIF-8, the chicken sample solution without the ETP addition and C/ZIF-8 adsorption (d).
